# Supplementary material for: Positron Annihilation Spectroscopy Study of Metallic Materials after High-Speed Cutting
Source: MDPI journal article supplement (doi:10.3390/ma15031017), 2022-01-28
Supplement: s1 [file s1]

# Positron Annihilation Spectroscopy Study of Metallic Materials after High-Speed Cutting

Jinquan Li <sup>1,\*</sup>, Roman Laptev <sup>2,\*</sup>, Iurii Bordulev <sup>2</sup>, Krzysztof Siemek <sup>3,4</sup>, Pawel Horodek <sup>3,4</sup>,  
Shen Haolun <sup>1</sup>, Anton Lomygin <sup>2</sup> and Jian Cui <sup>2</sup>

<sup>1</sup> School of Mechanical Engineering, Shenyang Ligong University, No.6 Nanping Center Road,

Hunnan New District, Shenyang 110159, China; shenhaolun0127@163.com (S.H.)

<sup>2</sup> Division for Experimental Physics, National Research Tomsk Polytechnic University, 634050 Tomsk, Russia; bus@tpu.ru (I.B.); lomyginanton141@gmail.com (A.L.); ttszyan@mail.ru (J.C.)

<sup>3</sup> Institute of Nuclear Physics Polish Academy of Sciences, PL-31342 Krakow, Poland; siemek.krzysztof@gmail.com (K.S.); pawel.horodek@ifj.edu.pl (P.H.)

<sup>4</sup> Joint Institute for Nuclear Research, Joliot-Curie 6, 141980 Dubna, Moscow Region, Russia

\* Correspondence: li\_jinquan@163.com (J.L.); laptevrs@tpu.ru (R.L.);  
Tel.: +7-913-852-3733 (R.L.)

## Supplementary materials

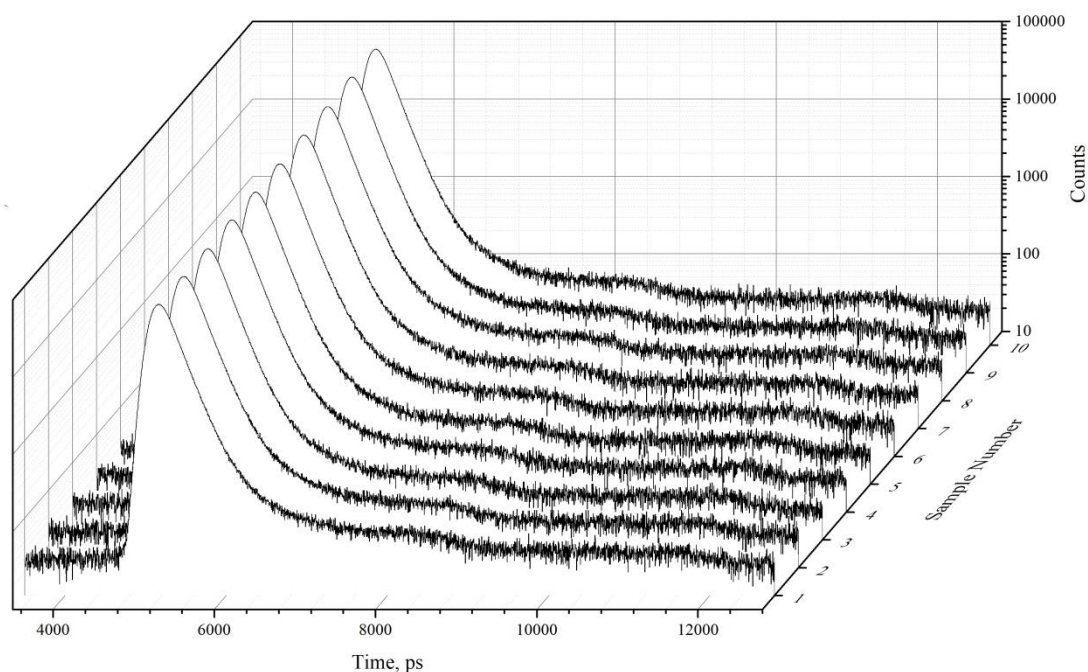

**Figure S1.** PALS spectra for GCr15 steel after high-speed cutting.

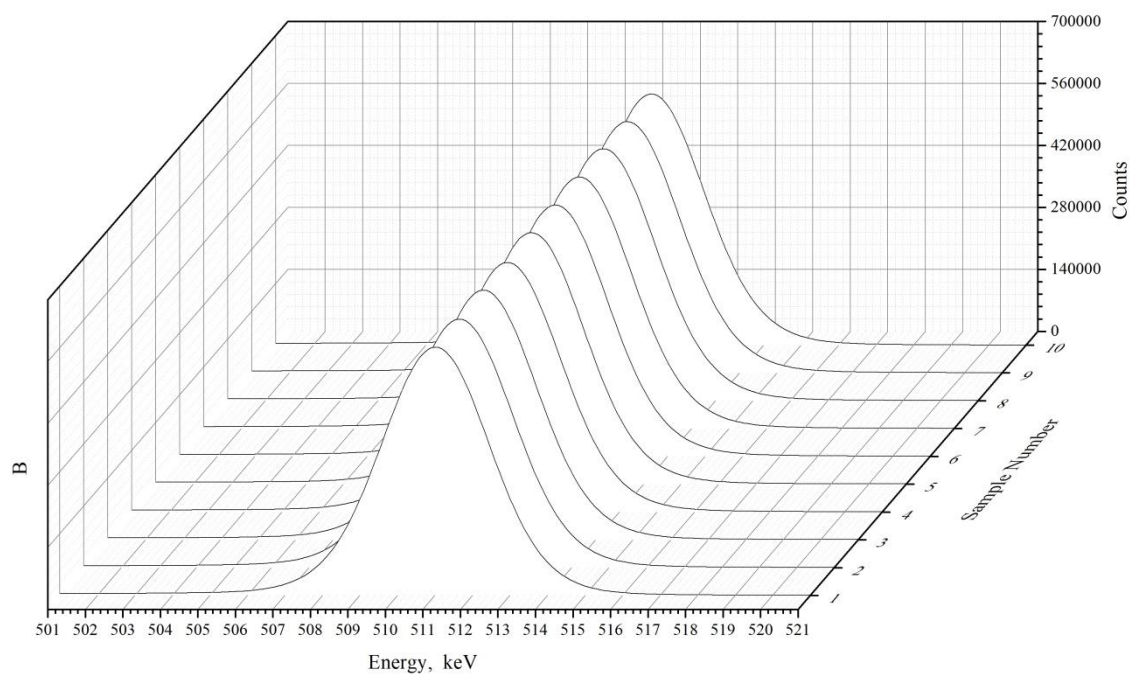

**Figure S2.** DBS spectra for GCr15 steel after high-speed cutting.

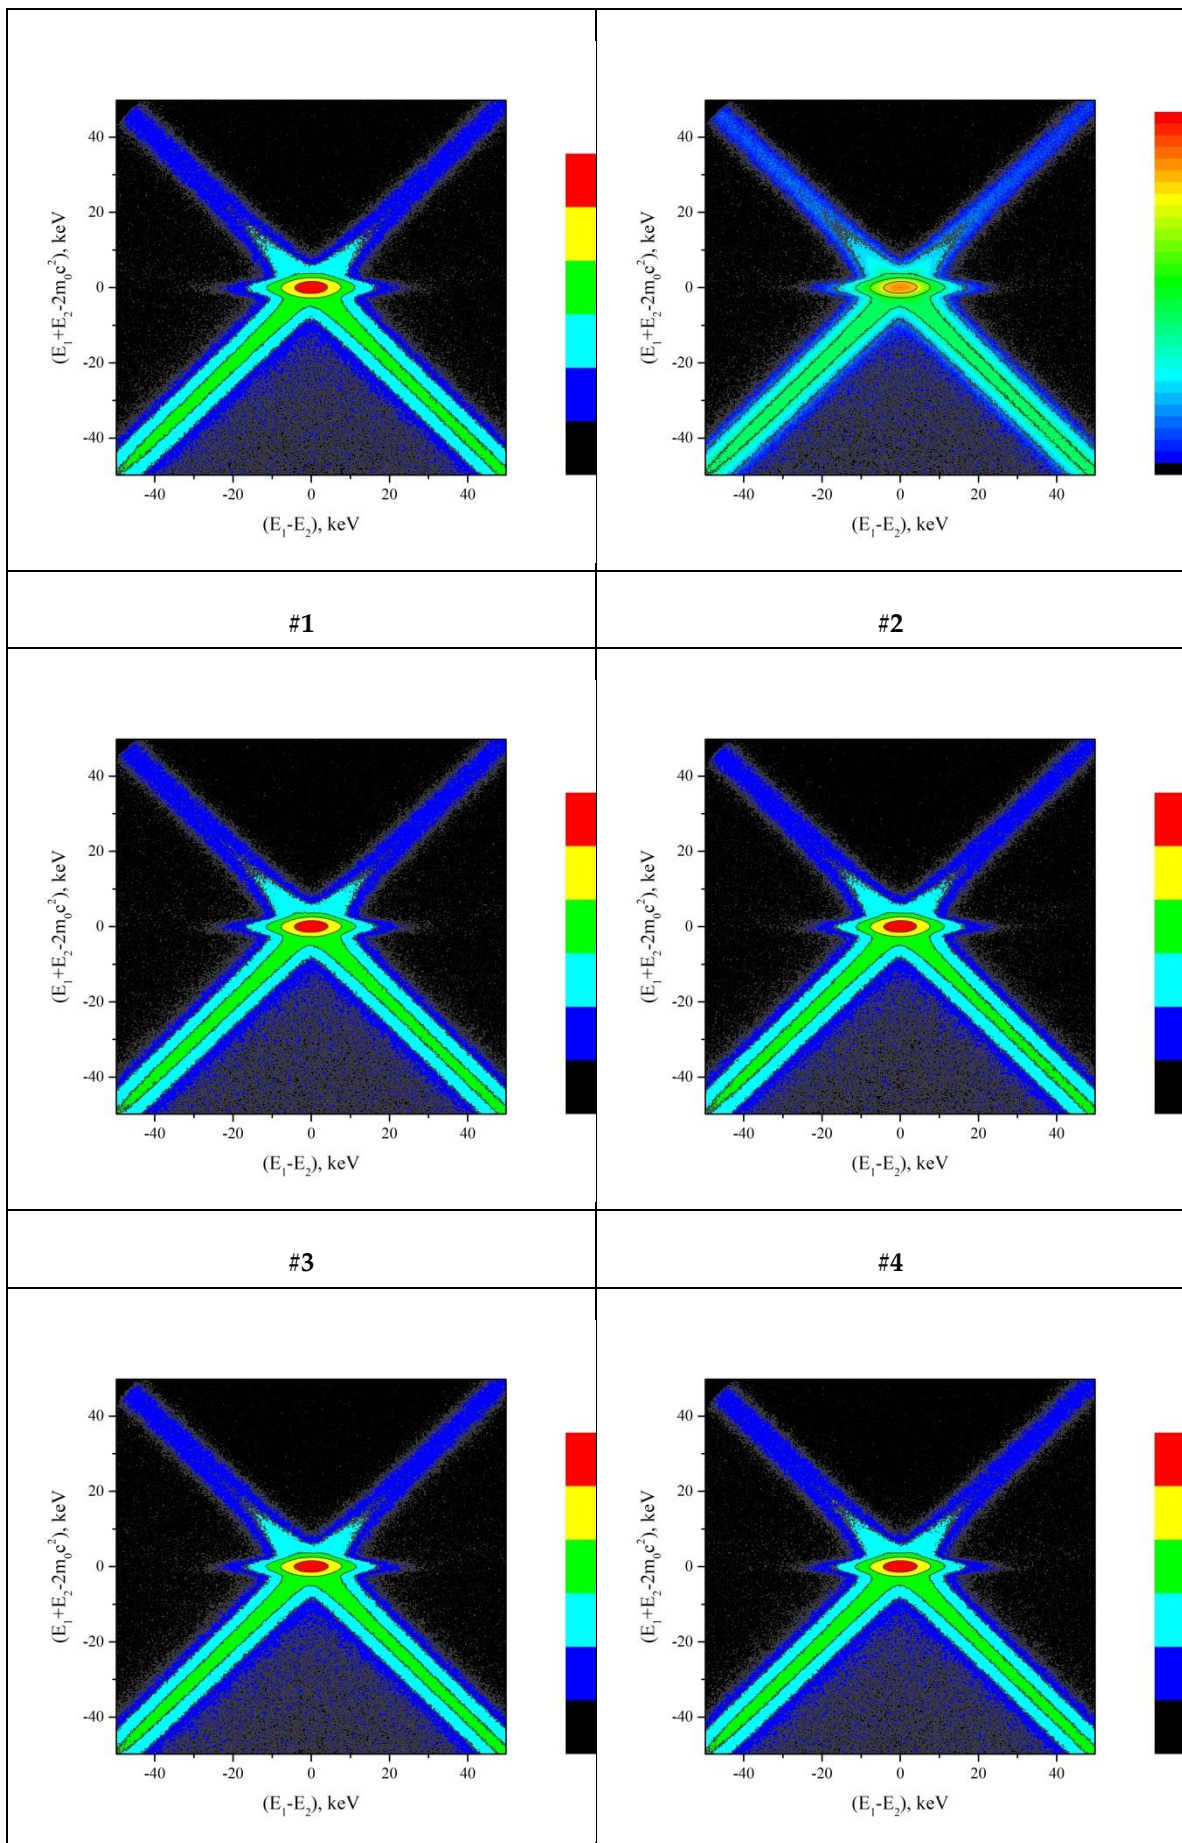

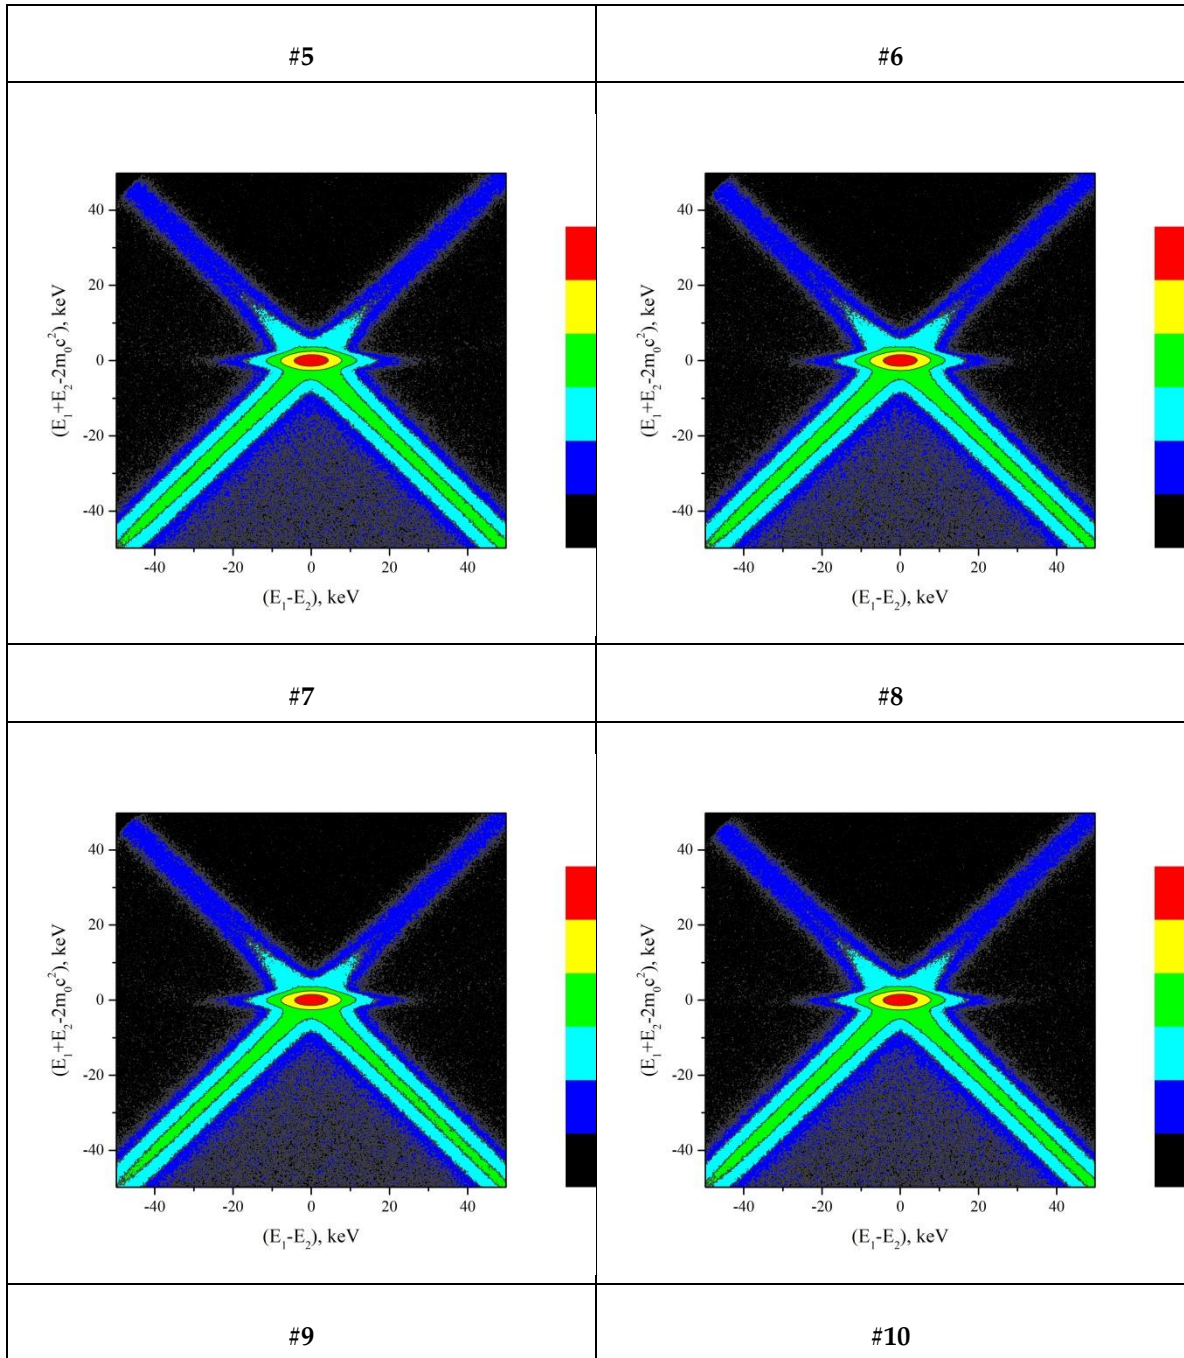

Figure S3. CDBS spectra for GCr15 steel after high-speed cutting.
